# Supplementary material for: Linked-read genome sequencing identifies biallelic pathogenic variants in DONSON as a novel cause of Meier-Gorlin syndrome
Source: PubMed Central journal article supplement (PMC7042968; doi:10.1136/jmedgenet-2019-106396), 2019-11-29
Supplement: jmedgenet-2019-106396supp001.pdf [file jmedgenet-2019-106396supp001.pdf]

**Table S1.** Oligonucleotides used in this study.

| <b>Mutagenesis oligonucleotides:</b>     |                                                   |
|------------------------------------------|---------------------------------------------------|
| DONSON_pR211C_S                          | CAAACCTCTCCTCTGAGCTCTGTTGTACCTTCCAGCAG            |
| DONSON_pR211C_AS                         | CTGCTGGAAGGTACAACAGAGCTCAGAGGAGAGTTTG             |
| DONSON_pY270C_S                          | GTGAGCTTTACTTCTCTATGTAATTTGCTGAAGACAAAAC          |
| DONSON_pY270C_AS                         | GTTTTGTCTTCAGCAAATTACATAGAGAAGTAAAGCTCAC          |
| DONSON_pP545L_S                          | GAGCAACTTAGTCAAATACTGTACTTGGGAAATCATC             |
| DONSON_pP545L_AS                         | GATGATTTCCAAGTAACAGTATTTGACTAAGTTGCTC             |
| DONSON_pP224S_S                          | CTTATCTATTGGCTCCACTCTGCTTTGTCTTGGCTAC             |
| DONSON_pP224S_AS                         | GTAGCCAAGACAAAAGCAGAGTGGAGCCAATAGATAAG            |
| DONSON_pF165S_S                          | GTCTATCAAACGCGACTCCTTTCCACCTCTTCTCAACCC           |
| DONSON_pF165S_AS                         | AAGGGTTGAGAAGAGGTGCTAAGGAGTCGCGTTTTGATAG          |
| <b>RT-PCR oligonucleotides:</b>          |                                                   |
| Rat_INS2_Ex2_F                           | CCTGCTCATCCTCTGGGAGC                              |
| Rat_INS2_Ex3_R                           | AGGTCTGAAGGTCACGGGGCC                             |
| Rat-DONSON_Ex5_R                         | CAGTTGTGCCACTTCATTTT                              |
| <b>Gateway cloning oligonucleotides:</b> |                                                   |
| DONSON_attB1_F1                          | GGGGACAAGTTTCTACAAAAAAGCAGGCTTACCCCAACAACAAATTCC  |
| DONSON_attB2_R1                          | GGGGACCACTTTGTACAAGAAAGCTGGGTACTGCCCATGAAACTGATCC |
| <b>Sequencing oligonucleotides:</b>      |                                                   |
| DONSON_seq_F1                            | GTACTGAGTTACCCGTAGATTGGTCTATC                     |
| DONSON_seq_F2                            | GACATACTTTCTATCAAGCTGCG                           |
| DONSON_seq_R1                            | ACAGATTCAGGTCTGTGATCC                             |
| DONSON_seq_R2                            | TGCCCAGGTAAGGGTTGAG                               |
| DONSON_seq_F3                            | TCATGTTAGCTGATAAAATCTTTAGG                        |
| DONSON_seq_R3                            | TGCAAAGGAGAGCATTTTAC                              |
| DONSON_seq_F4                            | GGCTTACCATTACATCTGGCTC                            |
| DONSON_seq_R4                            | CCTTCTGCCATTAACGTATCC                             |
| DONSON_seq_F5                            | GCGAGTCCTCATAACCAATTTT                            |
| DONSON_seq_R5                            | AAAAGTTTGCGGACTGCTG                               |
| DONSON_seq_F6                            | TGTCTCATGCATCTCAGTTGG                             |
| DONSON_seq_R6                            | ATTTCCATTTGCAAGGAAG                               |
| EGFP_seq_F1                              | GGAGTACAACACTACAACAGCC                            |
| EGFP_seq_R1                              | TCCGTGCGGAGCCGCACTAC                              |
| pEGFP_seq_F1                             | CAGAGCTGGTTTAGTGAACCGTCAG                         |
| pEGFP_seq_R1                             | AGGCACAGTCGAGGCTGATC                              |
| M13F                                     | GTA AACGACGGCCAG                                  |
| M13R                                     | CAGGAAACAGCTATGAC                                 |

**Table S2.** Summary statistics from the Long Ranger pipeline.

| <b>Summary Statistics</b>               | P1          | P2          | P3          | Average     |
|-----------------------------------------|-------------|-------------|-------------|-------------|
| <b>Input DNA</b>                        |             |             |             |             |
| Mean molecule length ( $\mu$ )          | 34,015      | 31,391      | 30,067      | 31,824      |
| DNA in molecules > 20kb                 | 71.70%      | 72.30%      | 71.20%      | 71.73%      |
| Corrected estimate of DNA loaded        | 1.21 ng     | 1.33 ng     | 1.03 ng     | 1.19 ng     |
| <b>GEMs</b>                             |             |             |             |             |
| Number detected                         | 1,670,049   | 1,652,325   | 1,734,425   | 1,685,600   |
| N50 linked-reads per molecule           | 20          | 17          | 20          | 19          |
| <b>Phasing</b>                          |             |             |             |             |
| SNPs phased                             | 98.30%      | 98.70%      | 98.90%      | 98.63%      |
| Longest phase block                     | 9,385,247   | 18,466,034  | 4,636,973   | 10,829,418  |
| N50 phase block length                  | 1,568,908   | 3,329,364   | 873,873     | 1,924,048   |
| <b>Sequencing</b>                       |             |             |             |             |
| Number reads                            | 774,189,712 | 763,832,020 | 808,535,762 | 782,185,831 |
| Mean depth                              | 33.7X       | 33.2X       | 34.6X       | 33.8X       |
| Mapped reads                            | 97.20%      | 97.10%      | 96.10%      | 96.80%      |
| Zero coverage                           | 0.12%       | 0.12%       | 0.95%       | 0.40%       |
| <b>Total variants (SNPs and Indels)</b> | 5,606,271   | 6,481,408   | 5,858,991   | 5,982,223   |

A

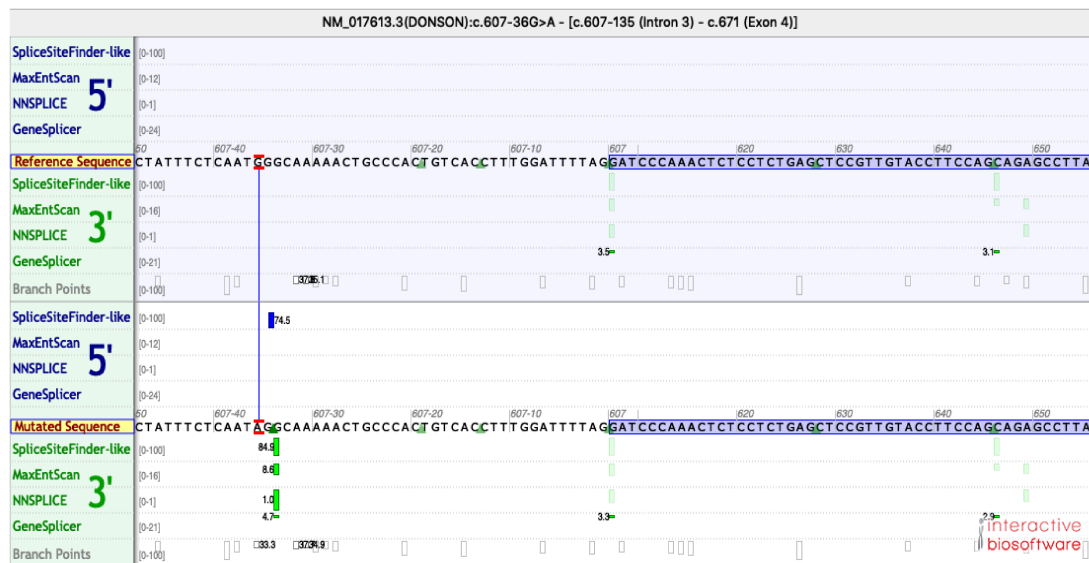

B

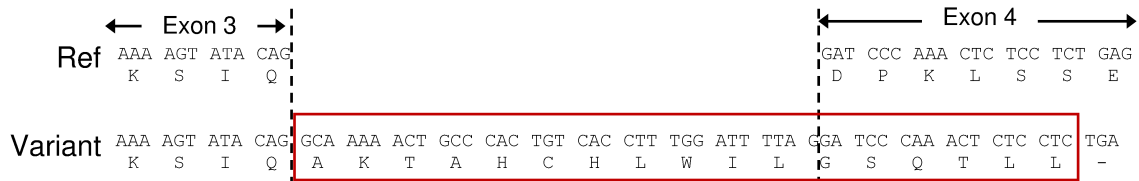

**Figure S1.** *In silico* splice site predictions for *DONSON* c.607-36G>A. (A) Screenshot from the Alamut Visual v2.11 software showing the predicted splicing effect of the variant. The top box represents the reference sequence with a G at position c.607-36 while the bottom box represents the variant sequence with an A at this position. The sequence encoding *DONSON* exon 4 is highlighted in blue. Probabilities for the use of the splice sites are indicated for four different algorithms, where the green bars below the sequence represent predicted acceptor splice sites and the dark blue bars above represent predicted donor splice sites. The figure shows that *DONSON* c.607-36G>A likely introduces a new splice acceptor splice site 34 bp upstream of the canonical splice acceptor site for exon 4. (B) Nucleotide and translated protein sequences of the mRNA transcripts expected for the reference sequence ('Ref') and the *DONSON* c.607-36G>A variant ('Variant'). Sequences encoded by exons 3 and 4 are indicated and exon/intron boundaries are shown with a dashed line. The intronic sequence likely included in the variant mRNA would alter the reading frame and introduce a stop codon after 17 amino acids (red box), likely causing nonsense mediated decay of this transcript.
